# Supplementary material
Source: MDPI journal article supplement (https://www.mdpi.com/2075-163X/8/7/274)
Supplement: s1 [file s1]

# Effect of grinding on tremolite-asbestos and anthophyllite-asbestos

Andrea Bloise <sup>1\*</sup>, Robert Kusiorowski<sup>2</sup> and Alessandro F. Gualtieri<sup>3</sup>.

<sup>1</sup>Department of Biology, Ecology and Earth Sciences, University of Calabria, I-87036 Arcavacata di Rende, CS, Italy

<sup>2</sup>Institute of Ceramics and Building Materials, Refractory Materials Division in Gliwice, ul. Toszecka 99, 44-100 Gliwice, Poland

<sup>3</sup>Department of Chemical and Geological Sciences. University of Modena and Reggio Emilia, I-41125 Modena, Italy;

\* Correspondence: andrea.bloise@unical.it; Tel.: +39 0984 493588

This file includes the supporting information of the paper entitled: “Effect of grinding on tremolite-asbestos and anthophyllite-asbestos”.

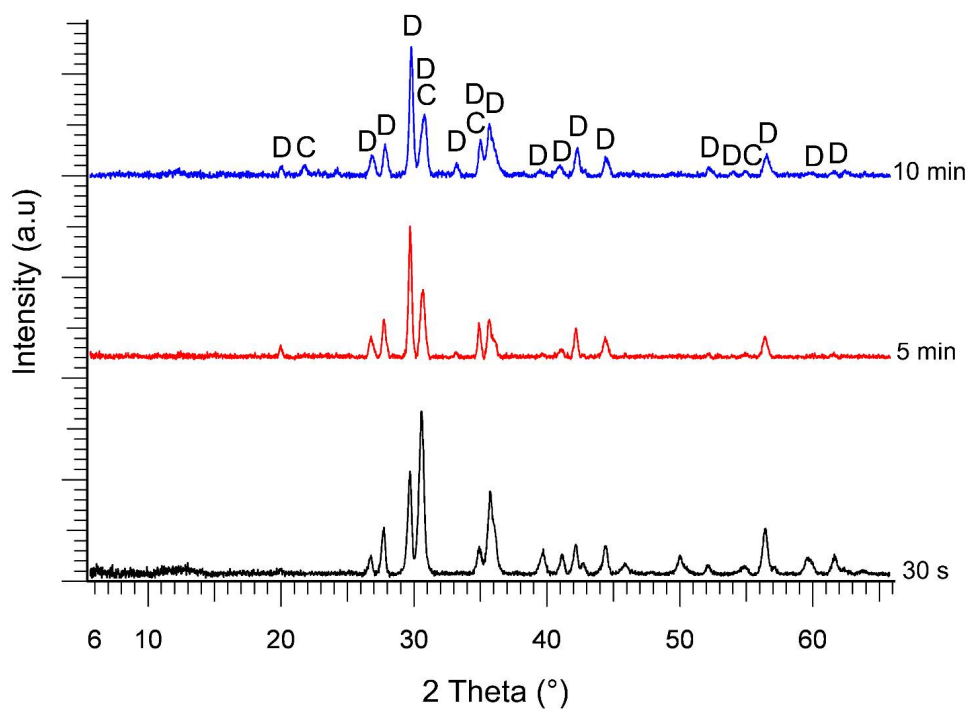

**Figure S1.** XRPD patterns after the heating at 1100 °C of tremolite asbestos ground for 30s, 5 and 10 min. Newly formed phases: D = diopside, C = cristobalite.

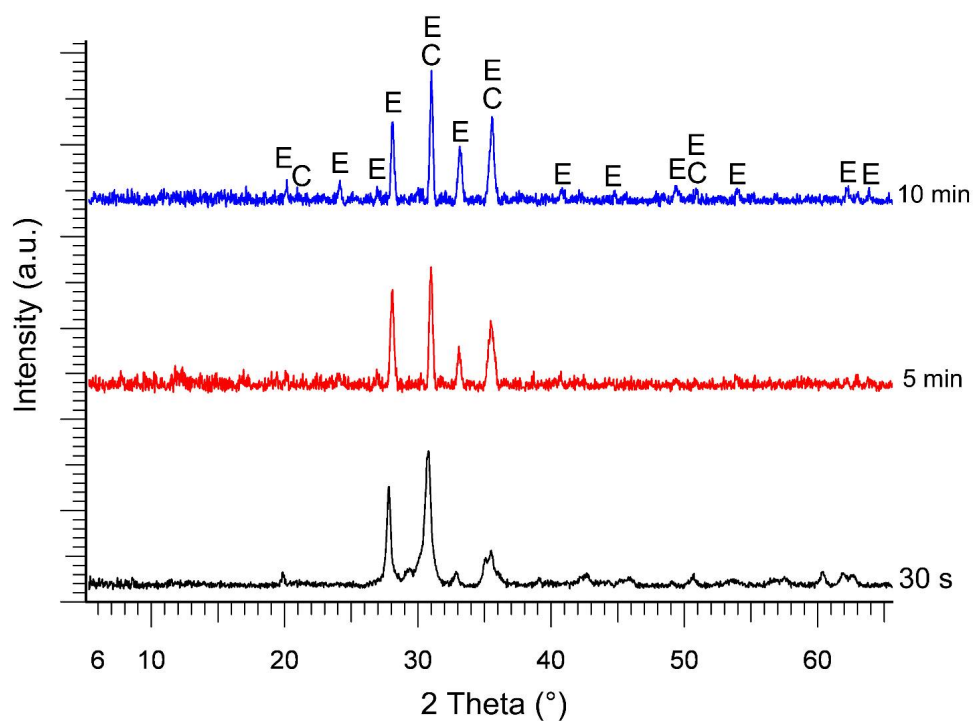

**Figure S2.** XRPD patterns after the heating at 1100 °C of anthophyllite asbestos ground for 30s, 5 and 10 min. Newly formed phases: E = enstatite, C = cristobalite.
